# Supplementary material
Source: publisher site journal article supplement (https://www.dovepress.com/article/412933)
Supplement: Supplementary file 1 [file get_supplementary_file.php]

Table S1. The definition of the characteristics in the article

| Characteristic | Definition |
| --- | --- |
| Size | Measurement of the longest diameter of the tumor at the largest cross-sectional level of the tumor. |
| APHE | Enhancement of the entire or part of the tumor on arterial phase images, significantly higher than the liver |
| Washout | Enhancement of the entire or part of the tumor on portal venous and delayed phase images is lower than the liver |
| Capsule | Distinct enhancing border around the entire or part of the tumor on portal venous or delayed phase image |
| Peritumoral enhancement | Crescent or polygonal enhancement is seen around the edge of the tumor on arterial phase images, appearing isointense on delayed phase images. |
| Mosaic architecture | Randomly distributed internal nodules or septations within the tumor, having different imaging characteristics. |
| Intratumoral hypoperfusion | Presence of very mild enhancement within the tumor on both arterial phase and portal venous phase images, involving at least 20% of the maximum cross-sectional diameter of the tumor area. |
| Intratumoral hemorrhage | The presence of ill-defined high signal within the tumor or around the tumor on T1-weighted images without the use of biopsy, trauma, or intervention. The signal does not disappear on T1 fat-suppressed or T2-weighted images. |
| Fat in mass | The tumor demonstrates a slightly higher signal than liver tissue on T1-weighted in-phase images, and the signal is lost on T1-weighted out-of-phase images. |
| Satellite nodules | Small cancerous lesions (≤2cm) within 2cm of the tumor margin in the liver, separated from the tumor by liver tissue. |
|  |  |

Table S2. Patterns recurrence categories in different categories of NTRScore

| Variable | NTRScore | | | P |
| --- | --- | --- | --- | --- |
|  | Low Medium High | | |  |
| Recurrence |  |  |  | 0.033 |
| Yes | 27(25.5%) | 42 (38.2%) | 17 (45.9%) |  |
| No | 79(74.5%) | 68 (61.8%) | 20 (54.1%) |  |
| Recurrence Category |  |  |  | 0.216 |
| Intrahepatic | 101(95.3%) | 102(92.7%) | 32(86.5%) |  |
| Extrahepatic | 5(4.7%) | 8(7.3%) | 5(13.5%) |  |
| Recurrence Stage |  |  |  | *p* < 0.001 |
| 0/A/B1 | 21(77.8%) | 27(64.3%) | 4(23.5%) |  |
| B2 and above | 6(22.2%) | 15(35.7%) | 13(76.5%) |  |
